# Supplementary material for: Flu and Tdap Maternal Immunization Hesitancy in Times of COVID-19: An Italian Survey on Multiethnic Sample
Source: MDPI journal article supplement (doi:10.3390/vaccines9101107), 2021-09-29
Supplement: s1 [file s1]

关于个人信息处理的了解和意愿表达  
托斯卡纳中部卫生局个人信息处理机构  
(2019/06/01 第一版)

Sig. / ra .....  
姓名  
Nato / a a ..... il .....  
出生地点和日期

*Finalità del trattamento. Titolare e responsabile del trattamento*

L' Azienda USL Toscana Centro tratterà i Suoi dati personali in accordo alle responsabilità previste dalle norme di buona pratica clinica (d.l. 211/2003) ed alle disposizioni vigenti in materia di protezione dei dati personali (Regolamento UE n. 2016/679 (General Data Protection Regulation) in relazione al Questionario circa le Vaccinazioni in Gravidanza in Era COVID-19 che Le abbiamo chiesto di compilare.

*个人信息处理的目的, 权限和责任*

托斯卡纳中部卫生局根据临床实践的规定(2003/211号法令)以及目前实施的个人信息保护条例(欧盟条例2016/679号《〈一般信息保护条例〉》),对于我们所提出的,在冠状病毒病-19爆发期间,孕妇的疫苗接种情况的问卷当中所涉及到的个人信息进行处理。

La Dr.ssa Anna Franca Cavaliere è individuata quale responsabile del trattamento dei dati.

Anna Franca Cavaliere医生被确定为个人信息处理的责任人

La Dr.ssa Cavaliere si avvarrà dei collaboratori di seguito indicati, individuati quali incaricati del trattamento:

Cavaliere医生将会与以下人员合作,他们会被确定对信息的处理负责

Dr.ssa Laura Marchi, Dirigente Medico SOC Ostetricia e Ginecologia Santo Stefano- Azienda USL Toscana Centro

Laura Marchi 医生,托斯卡纳中部卫生局圣·斯泰法诺妇产科主任医师

Ost. Claudia Foglia, Coordinatrice Reparto Ostetrico

Claudia Foglia 产科住院部护士长

I dati da lei conferiti saranno di tipo anagrafico ed anamnestico.

您所提供的信息将会被记录保存

关于个人信息处理的了解和意愿表达  
托斯卡纳中部卫生局个人信息处理机构  
(2019/06/01 第一版)

*Modalità del trattamento*

*处理方式*

I dati saranno trattati mediante strumenti elettronici. I medici La identificheranno con un codice: i dati che La riguardano, raccolti nel corso dello studio, saranno registrati, elaborati e conservati per sette anni unitamente a tale codice. Soltanto il medico ed i soggetti autorizzati potranno collegare questo codice al Suo nominativo.

信息将使用电子设备处理。医生通过编号来区别数据提供者。对研究期间所收集的  
有关信息使用编号进行记录，整理以及保存7年。只有医生和被授权的人员才能通过编号  
连结到信息提供者的名字。

I dati potranno essere diffusi, ad esempio attraverso pubblicazioni scientifiche, statistiche e convegni scientifici, solo in forma rigorosamente anonima.

信息可能会通过科学出版，统计以及学术会议，以严格的不记名的的方式传播。  
Potrà esercitare i diritti di cui all'art. 7 del Codice (es. accedere ai Suoi dati personali, integrarli, aggiornarli, rettificarli, opporsi al loro trattamento per motivi legittimi, ecc.) rivolgendosi direttamente alla Dr.ssa Cavaliere.

您可以直接与Cavaliere医生接洽，行使该法第7条所赋予的权利（查看您的个人信息，增加，修改，纠正，或者由于法律原因，反对他们对您的信息进行处理等等）

*Consenso同意*

Sottoscrivendo tale modulo acconsento al trattamento dei miei dati personali per gli scopi del Questionario nei limiti e con le modalità indicate nell'informativa fornitami con il presente documento.

回答这份问卷的问题表明我同意为着这些问题的用处，按上述所叙述的方式处理我个人的信息。

Firma dell' interessato .....  
签字

Data

日期
